# Supplementary material for: Genetic diversity of avian leukosis virus subgroup J (ALV-J): toward a unified phylogenetic classification and nomenclature system
Source: PubMed Central journal article supplement — Virus Evol. 2021 Apr 15;7(1):veab037. doi: 10.1093/ve/veab037 (PMC8129623; doi:10.1093/ve/veab037), 2021-04-15
Supplement: veab037_supplementary_data.pdf [file veab037_supplementary_data.pdf]

## Genetic diversity of avian leukosis virus subgroup J (ALV-J): Toward a unified phylogenetic classification and nomenclature system

Qiaomu Deng<sup>1,†</sup>, Min Li<sup>1,†</sup>, Chengwei He<sup>2,†</sup>, Qiaoe Lu<sup>1</sup>, Yanli Gao<sup>1</sup>, QiuHong Li<sup>1</sup>, Mengya Shi<sup>1</sup>, Peikun Wang<sup>3,\*</sup>, Ping Wei<sup>1,\*</sup>

**Supplementary Table S1.** Details of strains obtained from our group and used in the study

| No. | Strains         | Accession no. | Host | Location       | Time       | Method <sup>1</sup> | Method <sup>2</sup> | Sample          |
|-----|-----------------|---------------|------|----------------|------------|---------------------|---------------------|-----------------|
| 1   | GX13LT02        | KY983559      | Y    | Guangxi, China | 2013       | 1.1                 | 1.1                 |                 |
| 2   | GX14YYA1        | MF461280      | V    | Guangxi, China | 2014       | 1.1                 | 1.1                 |                 |
| 3   | GX14YYD2        | KU937324      | N    | Guangxi, China | 2014       | 1.1                 | 1.1                 |                 |
| 4   | GX14FF01        | KU848765      | Y    | Guangxi, China | 2014       | 1.1                 | 1.1                 |                 |
| 5   | GX14ZS14        | KX037423      | Y    | Guangxi, China | 2014       | 1.1                 | 1.1                 |                 |
| 6   | GX14DJ22        | KY983564      | G    | Guangxi, China | 2014       | 1.1                 | 1.1                 |                 |
| 7   | GX14DJ45        | KY983565      | G    | Guangxi, China | 2014       | 1.1                 | 1.1                 |                 |
| 8   | GX14DJ49        | KY983566      | G    | Guangxi, China | 2014       | 1.1                 | 1.1                 |                 |
| 9   | GX14DJ53        | KY983567      | G    | Guangxi, China | 2014       | 1.1                 | 1.1                 |                 |
| 10  | GX14PP03        | KX506774      | N    | Guangxi, China | 2014       | 1.1                 | 1.1                 |                 |
| 11  | GX15PP03        | KU848762      | Y    | Guangxi, China | 2015       | 1.1                 | 1.1                 |                 |
| 12  | <b>GX20YL01</b> | MW491262      | Y    | Guangxi, China | 2020       | 1.1                 | 1.1                 | Clinical sample |
| 13  | <b>GX20YL02</b> | MW491263      | Y    | Guangxi, China | 2020       | 1.1                 | 1.1                 | Clinical sample |
| 14  | <b>GX20YL08</b> | MW491269      | Y    | Guangxi, China | 2020       | 1.1                 | 1.1                 | Plasma sample   |
| 15  | GX12NN03        | KT598489      | Y    | Guangxi, China | 2012       | 1.2                 | 1.2                 |                 |
| 16  | GX12NN04        | KT598488      | Y    | Guangxi, China | 2012       | 1.2                 | 1.2                 |                 |
| 17  | GX12NN07        | KT598487      | Y    | Guangxi, China | 2012       | 1.2                 | 1.2                 |                 |
| 18  | GX12NN18        | KT598485      | Y    | Guangxi, China | 2012       | 1.2                 | 1.2                 |                 |
| 19  | GX13YL03        | KT598476      | Y    | Guangxi, China | 2013       | 1.2                 | 1.2                 |                 |
| 20  | GX13NN02        | KT598482      | Y    | Guangxi, China | 2013       | 1.2                 | 1.2                 |                 |
| 21  | GX13NN10        | KT598481      | Y    | Guangxi, China | 2013       | 1.2                 | 1.2                 |                 |
| 22  | GX13NN13        | KT598480      | Y    | Guangxi, China | 2013       | 1.2                 | 1.2                 |                 |
| 23  | GX13NN14        | KT598479      | Y    | Guangxi, China | 2013       | 1.2                 | 1.2                 |                 |
| 24  | GX13NN19        | KT598478      | Y    | Guangxi, China | 2013       | 1.2                 | 1.2                 |                 |
| 25  | GX14QZ02        | KT598472      | N    | Guangxi, China | 2014       | 1.2                 | 1.2                 |                 |
| 26  | GX14YL03        | KR025484      | Y    | Guangxi, China | 2014-04-11 | 1.2                 | 1.2                 |                 |
| 27  | GX14YL13        | KT598468      | Y    | Guangxi, China | 2014       | 1.2                 | 1.2                 |                 |
| 28  | <b>GX17GG01</b> | MW491258      | Y    | Guangxi, China | 2017       | 1.2                 | 1.2                 |                 |
| 29  | GX-J-4          | JQ246093      | Y    | Guangxi, China | 2010       | 1.3                 | 1.3                 |                 |
| 30  | GX-J-5          | JQ246094      | Y    | Guangxi, China | 2010       | 1.3                 | 1.3                 |                 |
| 31  | GX-J-6          | JQ246095      | N    | Guangxi, China | 2010-11    | 1.3                 | 1.3                 |                 |
| 32  | GX-J-7          | JQ246096      | Y    | Guangxi, China | 2010       | 1.3                 | 1.3                 |                 |
| 33  | GX-J-8          | JQ246097      | Y    | Guangxi, China | 2010       | 1.3                 | 1.3                 |                 |
| 34  | GX-J-9          | JQ246098      | Y    | Guangxi, China | 2010       | 1.3                 | 1.3                 |                 |
| 35  | GX-J-10         | JQ246099      | Y    | Guangxi, China | 2010       | 1.3                 | 1.3                 |                 |
| 36  | GX10YL04        | KT598498      | Y    | Guangxi, China | 2010       | 1.3                 | 1.3                 |                 |
| 37  | GX10YL22        | KT598497      | Y    | Guangxi, China | 2010       | 1.3                 | 1.3                 |                 |
| 38  | GX10GL08        | KT598499      | Y    | Guangxi, China | 2010       | 1.3                 | 1.3                 |                 |
| 39  | GXSH02          | HQ185698      | N    | Guangxi, China | 2010       | 1.3                 | 1.3                 |                 |
| 40  | GX10GL07        | KT598500      | Y    | Guangxi, China | 2010       | 1.3                 | 1.3                 |                 |
| 41  | GX-E-9          | HM988992      | N    | Guangxi, China | 2010-05    | 1.3                 | 1.3                 |                 |
| 42  | GX11GL09        | KT598496      | Y    | Guangxi, China | 2011       | 1.3                 | 1.3                 |                 |
| 43  | GX11GL10        | KT598495      | Y    | Guangxi, China | 2011       | 1.3                 | 1.3                 |                 |

|    |                 |          |   |                |      |            |            |
|----|-----------------|----------|---|----------------|------|------------|------------|
| 44 | GX11GL12        | KT598494 | Y | Guangxi, China | 2011 | 1.3        | 1.3        |
| 45 | GX11GL13        | KT598493 | Y | Guangxi, China | 2011 | 1.3        | 1.3        |
| 46 | GX12GL07        | KT598492 | Y | Guangxi, China | 2012 | 1.3        | 1.3        |
| 47 | GX12GL08        | KT598491 | Y | Guangxi, China | 2012 | 1.3        | 1.3        |
| 48 | GX12GL09        | KT598490 | Y | Guangxi, China | 2012 | 1.3        | 1.3        |
| 49 | GX12NN17        | KT598486 | Y | Guangxi, China | 2012 | 1.3        | 1.3        |
| 50 | GX12NN19        | KT598484 | Y | Guangxi, China | 2012 | 1.3        | 1.3        |
| 51 | GX12NN20        | KT598483 | Y | Guangxi, China | 2012 | 1.3        | 1.3        |
| 52 | GX13ZS12        | KY983563 | G | Guangxi, China | 2013 | 1.3        | 1.3        |
| 53 | GX13DF16        | KY983554 | W | Guangxi, China | 2013 | 1.3        | 1.3        |
| 54 | GX13DF19        | KY983555 | W | Guangxi, China | 2013 | 1.3        | 1.3        |
| 55 | GX13DF32        | KY983556 | W | Guangxi, China | 2013 | 1.3        | 1.3        |
| 56 | GX13DF41        | KY983557 | W | Guangxi, China | 2013 | 1.3        | 1.3        |
| 57 | GX13DF52        | KU848768 | W | Guangxi, China | 2013 | <b>1.3</b> | <b>1.1</b> |
| 58 | GX13DF57        | KY983558 | W | Guangxi, China | 2013 | 1.3        | 1.3        |
| 59 | GX13QZ14        | KT598477 | Y | Guangxi, China | 2013 | 1.3        | 1.3        |
| 60 | GX13ZS02        | KY983561 | Y | Guangxi, China | 2013 | 1.3        | 1.3        |
| 61 | GX13ZS05        | KY983562 | Y | Guangxi, China | 2013 | 1.3        | 1.3        |
| 62 | GX14YY17        | KU848764 | Y | Guangxi, China | 2014 | 1.3        | 1.3        |
| 63 | GX14NN01        | MN066154 | N | Guangxi, China | 2014 | 1.3        | 1.3        |
| 64 | GX14NN02        | MN066153 | N | Guangxi, China | 2014 | 1.3        | 1.3        |
| 65 | GX14LT03        | KY983547 | Y | Guangxi, China | 2014 | 1.3        | 1.3        |
| 66 | GX14LT04        | KY983548 | Y | Guangxi, China | 2014 | 1.3        | 1.3        |
| 67 | GX14YL03        | KT598470 | Y | Guangxi, China | 2014 | 1.3        | 1.3        |
| 68 | GX14YL04        | KT598469 | Y | Guangxi, China | 2014 | 1.3        | 1.3        |
| 69 | GX14HG01        | KU997685 | N | Guangxi, China | 2014 | 1.3        | 1.3        |
| 70 | GX14HG04        | KX058878 | Y | Guangxi, China | 2014 | 1.3        | 1.3        |
| 71 | GX14BL09        | KT598473 | Y | Guangxi, China | 2014 | 1.3        | 1.3        |
| 72 | GX14HC01        | KU923583 | L | Guangxi, China | 2014 | 1.3        | 1.3        |
| 73 | GX14LT01        | KY983546 | Y | Guangxi, China | 2014 | 1.3        | 1.3        |
| 74 | GD15MM01        | MN066152 | N | Guangxi, China | 2015 | 1.3        | 1.3        |
| 75 | GD15MM02        | MN066151 | N | Guangxi, China | 2015 | 1.3        | 1.3        |
| 76 | GX15MM6-1       | KU923584 | Y | Guangxi, China | 2015 | <b>1.3</b> | <b>1.1</b> |
| 77 | GX15MM6-2       | KU934276 | Y | Guangxi, China | 2015 | 1.3        | 1.3        |
| 78 | GX15MM6-4       | KU848763 | Y | Guangxi, China | 2015 | 1.3        | 1.3        |
| 79 | GX16ZS01        | KU983549 | Y | Guangxi, China | 2016 | 1.3        | 1.3        |
| 80 | GX16ZS390       | KY983551 | Y | Guangxi, China | 2016 | 1.3        | 1.3        |
| 81 | GX16YL01        | MN066148 | Y | Guangxi, China | 2016 | 1.3        | 1.3        |
| 82 | GX16YL02        | MN066147 | Y | Guangxi, China | 2016 | 1.3        | 1.3        |
| 83 | GX16MM92        | MN066149 | Y | Guangxi, China | 2016 | 1.3        | 1.3        |
| 84 | GX16ZS352       | KY983550 | Y | Guangxi, China | 2016 | 1.3        | 1.3        |
| 85 | GX16ZSE10       | KY983553 | Y | Guangxi, China | 2016 | 1.3        | 1.3        |
| 86 | GX16ZS748       | KY983552 | Y | Guangxi, China | 2016 | 1.3        | 1.3        |
| 87 | GX17YL01        | MN066143 | Y | Guangxi, China | 2017 | 1.3        | 1.3        |
| 88 | <b>GX17YL02</b> | MW491254 | Y | Guangxi, China | 2017 | 1.3        | 1.3        |
| 89 | <b>GX17YL03</b> | MW491255 | Y | Guangxi, China | 2017 | 1.3        | 1.3        |
| 90 | <b>GX17YL04</b> | MW491256 | Y | Guangxi, China | 2017 | 1.3        | 1.3        |
| 91 | GX17YL05        | MN066142 | Y | Guangxi, China | 2017 | 1.3        | 1.3        |
| 92 | <b>GX17QZ01</b> | MW491257 | Y | Guangxi, China | 2017 | 1.3        | 1.3        |
| 93 | GX17NN05        | MN066145 | N | Guangxi, China | 2017 | 1.3        | 1.3        |

|     |                  |          |   |                |      |     |     |                 |
|-----|------------------|----------|---|----------------|------|-----|-----|-----------------|
| 94  | GX17NN06         | MN066144 | W | Guangxi, China | 2017 | 1.3 | 1.3 |                 |
| 95  | GX18NN01         | MN066141 | Y | Guangxi, China | 2018 | 1.3 | 1.3 |                 |
| 96  | GX18NN02         | MN066140 | Y | Guangxi, China | 2018 | 1.3 | 1.3 |                 |
| 97  | <b>GX18LZ017</b> | MW491259 | Y | Guangxi, China | 2018 | 1.3 | 1.3 | Plasma sample   |
| 98  | <b>GX19LZ094</b> | MW491260 | Y | Guangxi, China | 2019 | 1.3 | 1.3 | Plasma sample   |
| 99  | <b>GX19LZ096</b> | MW491261 | Y | Guangxi, China | 2019 | 1.3 | 1.3 | Plasma sample   |
| 100 | <b>GX20YL03</b>  | MW491264 | Y | Guangxi, China | 2020 | 1.3 | 1.3 | Clinical sample |
| 101 | <b>GX20YL04</b>  | MW491265 | Y | Guangxi, China | 2020 | 1.3 | 1.3 | Clinical sample |
| 102 | <b>GX20YL05</b>  | MW491266 | Y | Guangxi, China | 2020 | 1.3 | 1.3 | Clinical sample |
| 103 | <b>GX20YL06</b>  | MW491267 | Y | Guangxi, China | 2020 | 1.3 | 1.3 | Plasma sample   |
| 104 | <b>GX20YL07</b>  | MW491268 | Y | Guangxi, China | 2020 | 1.3 | 1.3 | Plasma sample   |
| 105 | <b>GX20YL09</b>  | MW491270 | Y | Guangxi, China | 2020 | 1.3 | 1.3 | Plasma sample   |
| 106 | <b>GX20YL10</b>  | MW491271 | Y | Guangxi, China | 2020 | 1.3 | 1.3 | Plasma sample   |

W: White-chickens; L: layers; Y: Yellow-chickens; V: contaminated live vaccine; G: gamecock; N: not available. <sup>1</sup>represents the classification results of a phylogenetic tree constructed using RAxML software; <sup>2</sup>represents the classification results of a phylogenetic tree constructed using IQ-TREE software.

**Supplementary Table S2.** Details of viruses obtained from the GenBank in the study

| No. | Viruses     | Accession no. | ev/J | Host | Location | Time | Method <sup>1</sup> | Method <sup>2</sup> |
|-----|-------------|---------------|------|------|----------|------|---------------------|---------------------|
| 1   | ADOL Line 0 | AF247392      | ev/J |      | USA      |      | 1.1                 | 1.1                 |
| 2   | 4-1         | AF125528      | ev/J |      | USA      |      | 1.1                 | 1.1                 |
| 3   | ADOL-R5-4   | AF076887      |      | W    | USA      |      | 1.1                 | 1.1                 |
| 4   | ADOL-Hc1    | AF097731      |      | W    | USA      | 1993 | 1.1                 | 1.1                 |
| 5   | 6683        | AF247387      |      | W    | USA      | 1997 | 1.1                 | 1.1                 |
| 6   | 5701        | AF247386      |      | W    | USA      | 1997 | 1.1                 | 1.1                 |
| 7   | UD4         | AF307951      |      | W    | USA      | 2000 | 1.1                 | 1.1                 |
| 8   | UD5         | AF307952      |      | W    | USA      | 2000 | 1.1                 | 1.1                 |
| 9   | 10022-2     | GU222396      |      | W    | USA      | 2006 | 1.1                 | 1.1                 |
| 10  | 10022-12    | GU222399      |      | W    | USA      | 2006 | 1.1                 | 1.1                 |
| 11  | 10022-16    | GU222400      |      | W    | USA      | 2006 | <b>1.1</b>          | <b>1.3</b>          |
| 12  | 10022-20    | GU222401      |      | W    | USA      | 2006 | <b>1.1</b>          | <b>1.3</b>          |
| 13  | 10075-12    | GU222405      |      | W    | USA      | 2006 | 1.1                 | 1.1                 |
| 14  | 10075-16    | GU222406      |      | W    | USA      | 2006 | 1.1                 | 1.1                 |
| 15  | 10075-20    | GU222407      |      | W    | USA      | 2006 | 1.1                 | 1.1                 |
| 16  | 10089-12    | GU222411      |      | W    | USA      | 2006 | 1.1                 | 1.1                 |
| 17  | 10089-16    | GU222412      |      | W    | USA      | 2006 | 1.1                 | 1.1                 |
| 18  | 10089-20    | GU222413      |      | W    | USA      | 2006 | 1.1                 | 1.1                 |
| 19  | PDR-59831   | KP284572      |      | W    | USA      | 2007 | 1.1                 | 1.1                 |
| 20  | 10022-4     | GU222397      |      | W    | USA      | 2006 | 1.1                 | 1.1                 |
| 21  | 10022-8     | GU222398      |      | W    | USA      | 2006 | 1.1                 | 1.1                 |
| 22  | 10075-2     | GU222402      |      | W    | USA      | 2006 | 1.1                 | 1.1                 |
| 23  | 10075-4     | GU222403      |      | W    | USA      | 2006 | 1.1                 | 1.1                 |
| 24  | 10075-8     | GU222404      |      | W    | USA      | 2006 | 1.1                 | 1.1                 |
| 25  | 10089-2     | GU222408      |      | W    | USA      | 2006 | 1.1                 | 1.1                 |
| 26  | 10089-4     | GU222409      |      | W    | USA      | 2006 | 1.1                 | 1.1                 |
| 27  | 10089-8     | GU222410      |      | W    | USA      | 2006 | 1.1                 | 1.1                 |
| 28  | EAV-15I     | AJ623289      | ev/J |      | UK       |      | 1.1                 | 1.1                 |
| 29  | EAV-6-3     | AJ623292      | ev/J |      | UK       |      | 1.1                 | 1.1                 |
| 30  | EAV-JF2     | AJ292967      | ev/J |      | UK       |      | 1.1                 | 1.1                 |
| 31  | EAV-21-1    | AJ623291      | ev/J |      | UK       |      | 1.1                 | 1.1                 |

|    |           |          |      |   |                  |            |     |     |
|----|-----------|----------|------|---|------------------|------------|-----|-----|
| 32 | HPRS103   | Z46390   |      | W | UK               | 1988       | 1.1 | 1.1 |
| 33 | 4.1       | AY157601 | ev/J |   | France           |            | 1.1 | 1.1 |
| 34 | PK19FA01  | MN956379 |      | N | Pakistan         | 2019       | 1.1 | 1.1 |
| 35 | WN100403  | HQ333257 |      | Y | Anhui, China     | 2010-04    | 1.1 | 1.1 |
| 36 | AHq02     | KF534753 |      | Y | Anhui, China     | 2012       | 1.1 | 1.1 |
| 37 | BF        | KY085945 | ev/J | Y | Beijing, China   | 2014       | 1.1 | 1.1 |
| 38 | BJ0301    | AY897230 |      | W | Beijing, China   | 2003       | 1.1 | 1.1 |
| 39 | BJ0302    | AY897231 |      | W | Beijing, China   | 2003       | 1.1 | 1.1 |
| 40 | BJ0303    | AY897232 |      | W | Beijing, China   | 2003       | 1.1 | 1.1 |
| 41 | BJ090201J | HQ333267 |      | N | Beijing, China   | 2009-02    | 1.1 | 1.1 |
| 42 | FJ201306  | KM655820 |      | L | Fujian, China    | 2013       | 1.1 | 1.1 |
| 43 | FJ201307  | KM655821 |      | L | Fujian, China    | 2013       | 1.1 | 1.1 |
| 44 | FJ201308  | KM655822 |      | L | Fujian, China    | 2013       | 1.1 | 1.1 |
| 45 | WF13      | KJ631314 |      | N | Guangdong, China | 2013-03    | 1.1 | 1.1 |
| 46 | WC512     | KJ631316 |      | N | Guangdong, China | 2012-05    | 1.1 | 1.1 |
| 47 | WJ612     | KJ631317 |      | N | Guangdong, China | 2012-06    | 1.1 | 1.1 |
| 48 | WL12      | KJ631318 |      | N | Guangdong, China | 2012-06    | 1.1 | 1.1 |
| 49 | WSC512    | KJ631320 |      | N | Guangdong, China | 2012-05    | 1.1 | 1.1 |
| 50 | WSC912    | KJ631321 |      | N | Guangdong, China | 2012-09    | 1.1 | 1.1 |
| 51 | GD1401J   | KP317564 |      | Y | Guangdong, China | 2014-10-18 | 1.1 | 1.1 |
| 52 | GD1402J   | KP317565 |      | Y | Guangdong, China | 2014-10-18 | 1.1 | 1.1 |
| 53 | GD1403J   | KP317566 |      | Y | Guangdong, China | 2014-10-18 | 1.1 | 1.1 |
| 54 | GZA10     | KX056478 |      | Y | Guizhou, China   | 2016-02-20 | 1.1 | 1.1 |
| 55 | GZL25     | KX077609 |      | Y | Guizhou, China   | 2016-02-28 | 1.1 | 1.1 |
| 56 | GZA14     | KX056479 |      | Y | Guizhou, China   | 2016-02-20 | 1.1 | 1.1 |
| 57 | GZN49     | KX077613 |      | Y | Guizhou, China   | 2016-02-28 | 1.1 | 1.1 |
| 58 | GZN41     | KX077612 |      | Y | Guizhou, China   | 2016-02-28 | 1.1 | 1.1 |
| 59 | GZN18     | KX077611 |      | Y | Guizhou, China   | 2016-02-28 | 1.1 | 1.1 |
| 60 | GZA8      | KX077606 |      | Y | Guizhou, China   | 2016-02-28 | 1.1 | 1.1 |
| 61 | GZZ32     | KX056484 |      | Y | Guizhou, China   | 2016-02-20 | 1.1 | 1.1 |
| 62 | GZD12     | KX056480 |      | Y | Guizhou, China   | 2016-02-20 | 1.1 | 1.1 |
| 63 | GZN16     | KX077610 |      | Y | Guizhou, China   | 2016-02-28 | 1.1 | 1.1 |
| 64 | GZZ2      | KX056483 |      | Y | Guizhou, China   | 2016-08-20 | 1.1 | 1.1 |
| 65 | GZA27     | KX010990 |      | Y | Guizhou, China   | 2016-08-20 | 1.1 | 1.1 |
| 66 | GZC33     | KX077607 |      | Y | Guizhou, China   | 2016-02-28 | 1.1 | 1.1 |
| 67 | GZL1      | KX077608 |      | Y | Guizhou, China   | 2016-02-28 | 1.1 | 1.1 |
| 68 | GZD17     | KX056482 |      | Y | Guizhou, China   | 2016-02-20 | 1.1 | 1.1 |
| 69 | GZD13     | KX056481 |      | Y | Guizhou, China   | 2016-02-20 | 1.1 | 1.1 |
| 70 | GZZ18     | KX010993 |      | Y | Guizhou, China   | 2016-02-20 | 1.1 | 1.1 |
| 71 | GZZ12     | KX010992 |      | Y | Guizhou, China   | 2016-02-20 | 1.1 | 1.1 |
| 72 | GZZ8      | KX010991 |      | Y | Guizhou, China   | 2016-02-20 | 1.1 | 1.1 |
| 73 | GZA3      | KX010989 |      | Y | Guizhou, China   | 2016-02-20 | 1.1 | 1.1 |
| 74 | GZZ47     | KX056485 |      | Y | Guizhou, China   | 2016-02-20 | 1.1 | 1.1 |
| 75 | SDAUAJ-3  | KY767730 |      | L | Hebei, China     | 2014       | 1.1 | 1.1 |
| 76 | LB        | KY085946 | ev/J | L | Hubei, China     | 2014       | 1.1 | 1.1 |
| 77 | RB        | KY085948 | ev/J | L | Hubei, China     | 2016       | 1.1 | 1.1 |
| 78 | HuB09JY04 | JN378888 |      | L | Hubei, China     | 2009       | 1.1 | 1.1 |
| 79 | HuB09XZ01 | JN378890 |      | L | Hubei, China     | 2009       | 1.1 | 1.1 |
| 80 | HUB09JY03 | HQ634811 |      | L | Hubei, China     | 2009-10    | 1.1 | 1.1 |
| 81 | HuB09XT02 | JN378889 |      | L | Hubei, China     | 2009       | 1.1 | 1.1 |

|     |           |          |      |    |                       |            |     |     |
|-----|-----------|----------|------|----|-----------------------|------------|-----|-----|
| 82  | IMC10200  | AY234051 |      | W  | Inner Mongolia, China | 2000       | 1.1 | 1.1 |
| 83  | SDC2000   | AY234052 |      | W  | Inner Mongolia, China | 2000       | 1.1 | 1.1 |
| 84  | NM2002-1  | HM235669 |      | W  | Inner Mongolia, China | 2002       | 1.1 | 1.1 |
| 85  | YZ9901    | AY897222 |      | W  | Jiangsu, China        | 1999-01    | 1.1 | 1.1 |
| 86  | YZ9902    | HM235670 |      | W  | Jiangsu, China        | 1999       | 1.1 | 1.1 |
| 87  | JS-nt     | HM235667 |      | W  | Jiangsu, China        | 2003       | 1.1 | 1.1 |
| 88  | HAY013    | HM235665 |      | Y  | Jiangsu, China        | 2008       | 1.1 | 1.1 |
| 89  | HA08      | HM235664 |      | L  | Jiangsu, China        | 2008       | 1.1 | 1.1 |
| 90  | SQ-J1211  | KC282895 |      | L  | Jiangsu, China        | 2012       | 1.1 | 1.1 |
| 91  | LS        | KY085947 | ev/J | Y  | Jiangsu, China        | 2014       | 1.1 | 1.1 |
| 92  | JS14NT01  | MN735308 |      | Y  | Jiangsu, China        | 2014       | 1.1 | 1.1 |
| 93  | NX0101    | DQ115805 |      | W  | Ningxia, China        | 2001       | 1.1 | 1.1 |
| 94  | DBYJ1105  | KC875861 |      | WB | Northeast China       | 2011-06-08 | 1.1 | 1.1 |
| 95  | DBYJ1101  | KC875863 |      | WB | Northeast China       | 2011-12-22 | 1.1 | 1.1 |
| 96  | SD0101    | AY897225 |      | W  | Shandong, China       | 2001       | 1.1 | 1.1 |
| 97  | SD9901    | AY897220 |      | W  | Shandong, China       | 1999-08    | 1.1 | 1.1 |
| 98  | SD9902    | AY897221 |      | W  | Shandong, China       | 1999-08    | 1.1 | 1.1 |
| 99  | SD0002    | AY897224 |      | W  | Shandong, China       | 2000       | 1.1 | 1.1 |
| 100 | SD0102    | AY897226 |      | W  | Shandong, China       | 2001       | 1.1 | 1.1 |
| 101 | SD0201    | AY897218 |      | W  | Shandong, China       | 2002       | 1.1 | 1.1 |
| 102 | SD0301    | AY897228 |      | W  | Shandong, China       | 2003       | 1.1 | 1.1 |
| 103 | BR119     | KF562373 |      | Y  | Shandong, China       | 2011       | 1.1 | 1.1 |
| 104 | LYJ195    | KF218957 |      | Y  | Shandong, China       | 2010-04-09 | 1.1 | 1.1 |
| 105 | SG-1      | KF218958 |      | Y  | Shandong, China       | 2011-04-08 | 1.1 | 1.1 |
| 106 | SG        | KY085949 | ev/J | Y  | Shandong, China       | 2014       | 1.1 | 1.1 |
| 107 | WL        | KY085950 | ev/J | L  | Shandong, China       | 2014       | 1.1 | 1.1 |
| 108 | BR2       | KF201289 |      | Y  | Shandong, China       | 2011-12-28 | 1.1 | 1.1 |
| 109 | DJ146     | KF218959 |      | G  | Shandong, China       | 2010-05-24 | 1.1 | 1.1 |
| 110 | BR170     | KF575331 |      | Y  | Shandong, China       | 2011-01-28 | 1.1 | 1.1 |
| 111 | BR09J     | JX444701 |      | Y  | Shandong, China       | 2011-12-05 | 1.1 | 1.1 |
| 112 | SD09TA04  | JN378893 |      | L  | Shandong, China       | 2009       | 1.1 | 1.1 |
| 113 | SDLWH34J  | HQ332146 |      | N  | Shandong, China       | 2009-02    | 1.1 | 1.1 |
| 114 | HR334     | JN388902 |      | Y  | Shandong, China       | 2010-10-31 | 1.1 | 1.1 |
| 115 | HR336     | JN388903 |      | Y  | Shandong, China       | 2010-10-31 | 1.1 | 1.1 |
| 116 | HR332     | JN388901 |      | Y  | Shandong, China       | 2010-10-31 | 1.1 | 1.1 |
| 117 | HR306J    | JN388905 |      | Y  | Shandong, China       | 2010-10-31 | 1.1 | 1.1 |
| 118 | HR313J    | JN388906 |      | Y  | Shandong, China       | 2010-10-31 | 1.1 | 1.1 |
| 119 | SDYC02J   | JN388907 |      | L  | Shandong, China       | 2010-10    | 1.1 | 1.1 |
| 120 | SDYC04J   | JN388908 |      | L  | Shandong, China       | 2010-10    | 1.1 | 1.1 |
| 121 | SDYC06J   | JN388910 |      | L  | Shandong, China       | 2010-10    | 1.1 | 1.1 |
| 122 | TA081225J | HQ333269 |      | N  | Shandong, China       | 2008-12    | 1.1 | 1.1 |
| 123 | QF081201J | HQ333268 |      | N  | Shandong, China       | 2008-12    | 1.1 | 1.1 |
| 124 | CL09DP01  | JN378882 |      | L  | Shandong, China       | 2009       | 1.1 | 1.1 |
| 125 | CL09DP02  | JN378883 |      | L  | Shandong, China       | 2009       | 1.1 | 1.1 |
| 126 | CL09DP03  | JN378884 |      | L  | Shandong, China       | 2009       | 1.1 | 1.1 |
| 127 | CL09DP04  | JN378885 |      | L  | Shandong, China       | 2009       | 1.1 | 1.1 |
| 128 | GL09DP01  | JN378886 |      | L  | Shandong, China       | 2009       | 1.1 | 1.1 |
| 129 | LH091101  | KF291259 |      | Y  | Shandong, China       | 2009-11-01 | 1.1 | 1.1 |
| 130 | LYJ15     | KF201290 |      | Y  | Shandong, China       | 2009-04-09 | 1.1 | 1.1 |
| 131 | SCNC1260  | KF796650 |      | Y  | Sichuan, China        | 2011-10    | 1.1 | 1.1 |

|     |              |          |    |                     |            |            |            |
|-----|--------------|----------|----|---------------------|------------|------------|------------|
| 132 | SCYA788      | KF796655 | Y  | Sichuan, China      | 2011-10    | 1.1        | 1.1        |
| 133 | SCYA931      | KF796656 | Y  | Sichuan, China      | 2011-10    | 1.1        | 1.1        |
| 134 | SCMZ40       | KF796646 | Y  | Sichuan, China      | 2011-10    | 1.1        | 1.1        |
| 135 | SCYA787      | KF796654 | Y  | Sichuan, China      | 2011-10    | 1.1        | 1.1        |
| 136 | SCYA759      | KF796640 | Y  | Sichuan, China      | 2011-10    | 1.1        | 1.1        |
| 137 | SCMZ120      | KF796648 | Y  | Sichuan, China      | 2011-10    | 1.1        | 1.1        |
| 138 | SCNC4160     | KF796651 | Y  | Sichuan, China      | 2011-10    | 1.1        | 1.1        |
| 139 | SCDY00       | KF796642 | W  | Sichuan, China      | 2011-10    | 1.1        | 1.1        |
| 140 | TW99         | AF497905 | N  | Taiwan, China       | 1999       | 1.1        | 1.1        |
| 141 | 2921-00      | EF653908 | N  | Taiwan, China       | 2000       | 1.1        | 1.1        |
| 142 | HH11         | JX014438 | N  | China               | 2011       | 1.1        | 1.1        |
| 143 | SVR807       | HM776937 | N  | Russia              | 2008-07    | 1.2        | 1.2        |
| 144 | GD0512       | EF103133 | Y  | Guangdong, China    | 2005       | <b>1.2</b> | <b>1.3</b> |
| 145 | ZH-08        | HQ316166 | W  | Guangdong, China    | 2008       | 1.2        | 1.2        |
| 146 | J-SDAU12-737 | KM873195 | Y  | Guangdong, China    | 2012       | 1.2        | 1.2        |
| 147 | GX14NN02     | MN735293 | Y  | Guangxi, China      | 2014       | 1.2        | 1.2        |
| 148 | GX15JL01     | MN735294 | Y  | Guangxi, China      | 2015       | 1.2        | 1.2        |
| 149 | GX-RJ01      | MT119963 | Y  | Guangxi, China      | 2020-02-01 | 1.2        | 1.2        |
| 150 | CAUTS01      | JF932002 | L  | Hebei, China        | 2009       | 1.2        | 1.2        |
| 151 | HB09-1       | HM600812 | L  | Hebei, China        | 2009-05    | 1.2        | 1.2        |
| 152 | HLJ13SH01    | KM376510 | L  | Heilongjiang, China | 2013-01-03 | 1.2        | 1.2        |
| 153 | HLJ09SH01    | HQ634806 | L  | Heilongjiang, China | 2009-11    | 1.2        | 1.2        |
| 154 | HLJ09SH02    | HQ634807 | L  | Heilongjiang, China | 2009-12    | 1.2        | 1.2        |
| 155 | HLJ10SH03    | HQ634813 | L  | Heilongjiang, China | 2010-08    | 1.2        | 1.2        |
| 156 | HLJ10SH04    | HQ634814 | L  | Heilongjiang, China | 2010-09    | 1.2        | 1.2        |
| 157 | HN0001       | AY897219 | W  | Henan, China        | 2001       | <b>1.2</b> | <b>1.3</b> |
| 158 | HN1001-1     | HQ260974 | L  | Henan, China        | 2010       | 1.2        | 1.2        |
| 159 | HN1001-2     | HQ260975 | L  | Henan, China        | 2010       | 1.2        | 1.2        |
| 160 | HN1001-3     | HQ260976 | L  | Henan, China        | 2010       | 1.2        | 1.2        |
| 161 | HUB09WH03    | HQ634805 | L  | Hubei, China        | 2009       | 1.2        | 1.2        |
| 162 | HuB09-1      | HM600813 | L  | Hubei, China        | 2009-09    | 1.2        | 1.2        |
| 163 | JS09GY5      | GU982309 | L  | Jiangsu, China      | 2009       | 1.2        | 1.2        |
| 164 | JS09GY3      | GU982308 | L  | Jiangsu, China      | 2009       | 1.2        | 1.2        |
| 165 | JS09GY6      | GU982310 | L  | Jiangsu, China      | 2009       | 1.2        | 1.2        |
| 166 | JS09GY07     | HM595734 | L  | Jiangsu, China      | 2009-11-16 | 1.2        | 1.2        |
| 167 | JS09GY2      | GU982307 | L  | Jiangsu, China      | 2009       | 1.2        | 1.2        |
| 168 | JS-J1209     | KC282893 | L  | Jiangsu, China      | 2012       | 1.2        | 1.2        |
| 169 | JS13NT01     | MN735301 | Y  | Jiangsu, China      | 2013       | 1.2        | 1.2        |
| 170 | JS14NT02     | MN735302 | Y  | Jiangsu, China      | 2014       | 1.2        | 1.2        |
| 171 | HQSC202      | KU981173 | Y  | Jiangsu, China      | 2015-01-18 | 1.2        | 1.2        |
| 172 | JL08CH3-1    | HQ634809 | L  | Jilin, China        | 2008       | 1.2        | 1.2        |
| 173 | JL093-1      | JN624878 | L  | Jilin, China        | 2009       | 1.2        | 1.2        |
| 174 | JL10HW01     | HQ634800 | L  | Jilin, China        | 2010       | 1.2        | 1.2        |
| 175 | LN08SY10     | HQ634802 | L  | Liaoning, China     | 2008-11    | 1.2        | 1.2        |
| 176 | LN09SY31     | HQ634803 | L  | Liaoning, China     | 2009-04    | 1.2        | 1.2        |
| 177 | WB11016j     | JX570795 | WB | Northeast China     | 2011-05    | 1.2        | 1.2        |
| 178 | WB11055      | JX570794 | WB | Northeast China     | 2011-05    | 1.2        | 1.2        |
| 179 | WB11008j     | JX570785 | WB | Northeast China     | 2011-05    | 1.2        | 1.2        |
| 180 | WB11075j     | JX570798 | WB | Northeast China     | 2011-05    | 1.2        | 1.2        |
| 181 | WB11038      | JX570789 | WB | Northeast China     | 2011-05    | 1.2        | 1.2        |

|     |              |          |     |                  |            |            |            |
|-----|--------------|----------|-----|------------------|------------|------------|------------|
| 182 | WB11098      | JX848322 | WB  | Northeast China  | 2011-05    | 1.2        | 1.2        |
| 183 | WB11042j     | JX570796 | WB  | Northeast China  | 2011-05    | 1.2        | 1.2        |
| 184 | WB11058j     | JX570793 | WB  | Northeast China  | 2011-05    | 1.2        | 1.2        |
| 185 | DBYJ1103     | KC875860 | WB  | Northeast China  | 2011-12-22 | 1.2        | 1.2        |
| 186 | DBYJ1106     | KC875859 | WB  | Northeast China  | 2011-06-08 | 1.2        | 1.2        |
| 187 | DBYJ1104     | KC875862 | WB  | Northeast China  | 2012-06-08 | 1.2        | 1.2        |
| 188 | DBYJ1102     | KC875858 | WB  | Northeast China  | 2012-12-22 | 1.2        | 1.2        |
| 189 | SD09DP03     | JN624879 | L   | Shandong, China  | 2009       | 1.2        | 1.2        |
| 190 | SDAU1001     | JN389517 | L   | Shandong, China  | 2010       | 1.2        | 1.2        |
| 191 | PL09DP5-1    | JN378891 | L   | Shandong, China  | 2009       | 1.2        | 1.2        |
| 192 | sdau1002     | JN389518 | L   | Shandong, China  | 2010       | 1.2        | 1.2        |
| 193 | LC110515-4   | KC841153 | Y   | Shandong, China  | 2011-05-15 | 1.2        | 1.2        |
| 194 | PL09DP5-2    | JN378892 | L   | Shandong, China  | 2009       | 1.2        | 1.2        |
| 195 | GL09DP02     | JN378887 | L   | Shandong, China  | 2009       | 1.2        | 1.2        |
| 196 | SDAU1005     | KT156668 | 817 | Shandong, China  | 2010       | 1.2        | 1.2        |
| 197 | SD100501J    | HQ270189 | 817 | Shandong, China  | 2010       | 1.2        | 1.2        |
| 198 | Fu-J5        | KT156669 | 817 | Shandong, China  | 2011       | 1.2        | 1.2        |
| 199 | SDAU1102     | KU159178 | L   | Shandong, China  | 2010-06-01 | 1.2        | 1.2        |
| 200 | LC110515-3   | KC841152 | Y   | Shandong, China  | 2011-05-15 | 1.2        | 1.2        |
| 201 | SD110503     | KF562374 | Y   | Shandong, China  | 2011-05-03 | 1.2        | 1.2        |
| 202 | SDAU1701     | KY980657 | L   | Shandong, China  | 2017       | 1.2        | 1.2        |
| 203 | SDAU1703     | KY980659 | L   | Shandong, China  | 2017       | 1.2        | 1.2        |
| 204 | SDAU1705     | KY980661 | L   | Shandong, China  | 2017       | 1.2        | 1.2        |
| 205 | SDAU1706     | KY980662 | L   | Shandong, China  | 2017       | 1.2        | 1.2        |
| 206 | ZB110604-5   | KC841156 | Y   | Shandong, China  | 2011-06-04 | <b>1.2</b> | <b>1.3</b> |
| 207 | SD12HN02     | KM873188 | Y   | Shandong, China  | 2012       | 1.2        | 1.2        |
| 208 | SD12HN03     | KM873189 | Y   | Shandong, China  | 2012       | 1.2        | 1.2        |
| 209 | SD12HN04     | KM873190 | Y   | Shandong, China  | 2012       | 1.2        | 1.2        |
| 210 | SD1009       | KF768000 | L   | Shandong, China  | 2010-09-01 | 1.2        | 1.2        |
| 211 | SX090912J    | HQ386988 | L   | Shanxi, China    | 2009-09-12 | 1.2        | 1.2        |
| 212 | SX090915J    | HQ386989 | L   | Shanxi, China    | 2009-09-15 | 1.2        | 1.2        |
| 213 | GD1109       | JX254901 | L   | Sichuan, China   | 2011       | 1.2        | 1.2        |
| 214 | CAUXT01      | JF932003 | N   | China            | 2009       | 1.2        | 1.2        |
| 215 | CAUYL01      | JF932004 | L   | China            | 2009       | 1.2        | 1.2        |
| 216 | CAUHM01      | JF932000 | L   | China            | 2009       | 1.2        | 1.2        |
| 217 | 4817         | AF247385 | W   | USA              | 1996       | 1.3        | 1.3        |
| 218 | UD2          | AF307949 | W   | USA              | 2000       | 1.3        | 1.3        |
| 219 | UD3          | AF307950 | W   | USA              | 2000       | 1.3        | 1.3        |
| 220 | EO49-1       | MF926334 | L   | Nigeria          | 2017-06-08 | 1.3        | 1.3        |
| 221 | EO49-2       | MF926335 | L   | Nigeria          | 2017-06-08 | 1.3        | 1.3        |
| 222 | PK19SA01     | MN956380 | N   | Pakistan         | 2018       | 1.3        | 1.3        |
| 223 | CLB908M      | JX855935 | N   | Russia           | 2009-08    | 1.3        | 1.3        |
| 224 | AHq01        | KF534752 | Y   | Anhui, China     | 2012       | 1.3        | 1.3        |
| 225 | WN100401     | KC711043 | N   | Anhui, China     | 2010-04    | 1.3        | 1.3        |
| 226 | WN100402     | HQ271448 | N   | Anhui, China     | 2010-04    | 1.3        | 1.3        |
| 227 | WN100404     | HQ333258 | Y   | Anhui, China     | 2010-04    | 1.3        | 1.3        |
| 228 | ALV-J-Anhui8 | MH186094 | N   | Anhui, China     | 2018-01-20 | 1.3        | 1.3        |
| 229 | GD06SL1      | EF107624 | Y   | Guangdong, China | 2006       | 1.3        | 1.3        |
| 230 | GD06SL2      | EF103129 | Y   | Guangdong, China | 2006       | 1.3        | 1.3        |
| 231 | GD06SL3      | EF103130 | Y   | Guangdong, China | 2006       | 1.3        | 1.3        |

|     |                   |          |   |                     |            |            |            |
|-----|-------------------|----------|---|---------------------|------------|------------|------------|
| 232 | GD06SL4           | EF103131 | Y | Guangdong, China    | 2006       | 1.3        | 1.3        |
| 233 | SCAU-0901         | FJ619190 | Y | Guangdong, China    | 2008-10-06 | 1.3        | 1.3        |
| 234 | SZ-08             | HM775329 | Y | Guangdong, China    | 2008       | 1.3        | 1.3        |
| 235 | 2921-00           | HM775330 | N | Guangdong, China    | 2010       | 1.3        | 1.3        |
| 236 | XX2-09            | HM775331 | Y | Guangdong, China    | 2009       | 1.3        | 1.3        |
| 237 | GDQY1201          | JX423792 | Y | Guangdong, China    | 2012       | 1.3        | 1.3        |
| 238 | GDKP1202          | JX453210 | Y | Guangdong, China    | 2012       | 1.3        | 1.3        |
| 239 | SCAU11-H          | KC149972 | W | Guangdong, China    | 2011       | 1.3        | 1.3        |
| 240 | SCAU11-XG         | KC149971 | W | Guangdong, China    | 2011       | 1.3        | 1.3        |
| 241 | WLY13             | KJ631311 | N | Guangdong, China    | 2013-07-01 | 1.3        | 1.3        |
| 242 | WGD13             | KJ631312 | N | Guangdong, China    | 2013       | 1.3        | 1.3        |
| 243 | WGZ13             | KJ631313 | N | Guangdong, China    | 2013-05    | 1.3        | 1.3        |
| 244 | WA1112            | KJ631315 | N | Guangdong, China    | 2012-11    | 1.3        | 1.3        |
| 245 | WSC112            | KJ631322 | N | Guangdong, China    | 2012-03    | 1.3        | 1.3        |
| 246 | GDQJ2             | KU156826 | N | Guangdong, China    | 2014-11-01 | 1.3        | 1.3        |
| 247 | GDQJ-4            | KU170199 | N | Guangdong, China    | 2014-11-01 | 1.3        | 1.3        |
| 248 | GDQJ-5            | KU170200 | N | Guangdong, China    | 2014-11-01 | 1.3        | 1.3        |
| 249 | GD13GZ            | KU500030 | Y | Guangdong, China    | 2013       | 1.3        | 1.3        |
| 250 | GD13HY            | KU500031 | Y | Guangdong, China    | 2013       | 1.3        | 1.3        |
| 251 | GD14J2            | KU500032 | W | Guangdong, China    | 2014       | 1.3        | 1.3        |
| 252 | GD1407            | KU500034 | Y | Guangdong, China    | 2014       | 1.3        | 1.3        |
| 253 | GD1407-L          | KU500035 | Y | Guangdong, China    | 2014       | 1.3        | 1.3        |
| 254 | GD1408-1          | KU500036 | Y | Guangdong, China    | 2014       | 1.3        | 1.3        |
| 255 | GD1408-2          | KU500037 | Y | Guangdong, China    | 2014       | 1.3        | 1.3        |
| 256 | GD1411-1          | KU500038 | Y | Guangdong, China    | 2014       | 1.3        | 1.3        |
| 257 | GD1411-4          | KU500041 | Y | Guangdong, China    | 2014       | 1.3        | 1.3        |
| 258 | M180              | KX611834 | Y | Guangdong, China    | 2016       | 1.3        | 1.3        |
| 259 | ALV-J-Guangdong11 | MH186095 | N | Guangdong, China    | 2018-01-20 | 1.3        | 1.3        |
| 260 | GDHN-YM1          | MK683478 | L | Guangdong, China    | 2018-12-01 | 1.3        | 1.3        |
| 261 | GDHN-YM2          | MK683479 | L | Guangdong, China    | 2018-12-08 | 1.3        | 1.3        |
| 262 | GDHN-YH1          | MK683480 | L | Guangdong, China    | 2018-11-29 | <b>1.3</b> | <b>1.1</b> |
| 263 | GDHN-YH2          | MK683481 | L | Guangdong, China    | 2018-12-20 | 1.3        | 1.3        |
| 264 | GDYH-B1           | MK940585 | Y | Guangdong, China    | 2018-11-12 | <b>1.3</b> | <b>1.1</b> |
| 265 | GD19GZ02          | MN893851 | Y | Guangdong, China    | 2019-11-11 | 1.3        | 1.3        |
| 266 | CAUGX01           | HM640943 | N | Guangxi, China      | 2009       | 1.3        | 1.3        |
| 267 | GX14NN01          | MN735292 | Y | Guangxi, China      | 2014       | 1.3        | 1.3        |
| 268 | GX16YL01          | MN735297 | Y | Guangxi, China      | 2016       | 1.3        | 1.3        |
| 269 | GX16NN05          | MN735309 | Y | Guangxi, China      | 2016       | 1.3        | 1.3        |
| 270 | GX16NN04          | MN735296 | Y | Guangxi, China      | 2016       | <b>1.3</b> | <b>1.1</b> |
| 271 | 2012004-C5        | KC453974 | N | Guangxi, China      | 2012-08-18 | 1.3        | 1.3        |
| 272 | 2012004-D4        | KC453975 | N | Guangxi, China      | 2012-08-18 | 1.3        | 1.3        |
| 273 | HB1801            | MN419352 | W | Hebei, China        | 2019-05-18 | 1.3        | 1.3        |
| 274 | HLJ09MDJ-1        | JN624880 | L | Heilongjiang, China | 2009       | 1.3        | 1.3        |
| 275 | HLJ13SH01         | KM376510 | L | Heilongjiang, China | 2013-01-03 | 1.3        | 1.3        |
| 276 | SCAU-HN06         | HQ900844 | L | Henan, China        | 2006       | 1.3        | 1.3        |
| 277 | NHH               | HM235668 | L | Henan, China        | 2007       | 1.3        | 1.3        |
| 278 | HB0301            | AY897229 | W | Hubei, China        | 2003       | 1.3        | 1.3        |
| 279 | HN17ZZ01          | MN735299 | Y | Hunan, China        | 2017       | 1.3        | 1.3        |
| 280 | HN17ZZ02          | MN735300 | Y | Hunan, China        | 2017       | 1.3        | 1.3        |
| 281 | JS-J1210          | KC282894 | L | Jiangsu, China      | 2012       | 1.3        | 1.3        |



|     |            |          |   |                 |            |            |            |
|-----|------------|----------|---|-----------------|------------|------------|------------|
| 282 | JS13DX03   | KM873177 | Y | Jiangsu, China  | 2013       | 1.3        | 1.3        |
| 283 | JS13DX06   | KM873178 | Y | Jiangsu, China  | 2013       | 1.3        | 1.3        |
| 284 | JS13DX07   | KM873179 | Y | Jiangsu, China  | 2013       | 1.3        | 1.3        |
| 285 | JS13LH03   | KM873180 | Y | Jiangsu, China  | 2013       | 1.3        | 1.3        |
| 286 | JS13LY02   | KM873181 | Y | Jiangsu, China  | 2013       | 1.3        | 1.3        |
| 287 | JS13LY09   | KM873182 | Y | Jiangsu, China  | 2013       | 1.3        | 1.3        |
| 288 | JS13LY14   | KM873183 | Y | Jiangsu, China  | 2013       | 1.3        | 1.3        |
| 289 | JS14XJ01   | KM873185 | Y | Jiangsu, China  | 2014       | 1.3        | 1.3        |
| 290 | JS14XJ02   | KM873186 | Y | Jiangsu, China  | 2014       | <b>1.3</b> | <b>1.1</b> |
| 291 | JS13LHAJ1  | KR049171 | L | Jiangsu, China  | 2013       | 1.3        | 1.3        |
| 292 | JS13LHAJ2  | KR049172 | L | Jiangsu, China  | 2013       | 1.3        | 1.3        |
| 293 | HQSC18     | KU981172 | Y | Jiangsu, China  | 2015-01-18 | 1.3        | 1.3        |
| 294 | SDAUAJ-5   | KY773916 | Y | Jiangsu, China  | 2015       | 1.3        | 1.3        |
| 295 | SDAUAJ-7   | KY773918 | Y | Jiangsu, China  | 2015       | <b>1.3</b> | <b>1.2</b> |
| 296 | SDAUAJ-8   | KY773919 | Y | Jiangsu, China  | 2015       | <b>1.3</b> | <b>1.2</b> |
| 297 | SDAUAJ-9   | KY773920 | Y | Jiangsu, China  | 2015       | 1.3        | 1.3        |
| 298 | SDAUAJ-12  | KY773922 | Y | Jiangsu, China  | 2015       | <b>1.3</b> | <b>1.2</b> |
| 299 | JS16JH2    | MG700534 | Y | Jiangsu, China  | 2016-08    | 1.3        | 1.3        |
| 300 | JS16JH3    | MG700535 | Y | Jiangsu, China  | 2016-08    | 1.3        | 1.3        |
| 301 | JS16JH4    | MG700536 | Y | Jiangsu, China  | 2016-08    | 1.3        | 1.3        |
| 302 | JS16JH5    | MG700537 | Y | Jiangsu, China  | 2016-08    | 1.3        | 1.3        |
| 303 | JS16JH8    | MG700540 | Y | Jiangsu, China  | 2016-08    | 1.3        | 1.3        |
| 304 | JS16JH9    | MG700541 | Y | Jiangsu, China  | 2016-08    | 1.3        | 1.3        |
| 305 | SD1804     | MN419338 | W | Jiangsu, China  | 2018-04-15 | 1.3        | 1.3        |
| 306 | JS1805     | MN419339 | W | Jiangsu, China  | 2018-04-18 | 1.3        | 1.3        |
| 307 | JS1806     | MN419340 | W | Jiangsu, China  | 2018-05-06 | 1.3        | 1.3        |
| 308 | JS1807     | MN419341 | W | Jiangsu, China  | 2018-07-29 | 1.3        | 1.3        |
| 309 | JS18YZ01   | MN735303 | Y | Jiangsu, China  | 2018       | 1.3        | 1.3        |
| 310 | JS18YZ02   | MN735304 | Y | Jiangsu, China  | 2018       | 1.3        | 1.3        |
| 311 | JS18YZ03   | MN735305 | Y | Jiangsu, China  | 2018       | 1.3        | 1.3        |
| 312 | JL1801     | MN419348 | W | Jilin, China    | 2019-04-14 | 1.3        | 1.3        |
| 313 | JL1802     | MN419349 | W | Jilin, China    | 2019-05-05 | 1.3        | 1.3        |
| 314 | JL1803     | MN419350 | W | Jilin, China    | 2019-05-11 | 1.3        | 1.3        |
| 315 | JL1804     | MN419351 | W | Jilin, China    | 2019-05-15 | 1.3        | 1.3        |
| 316 | CAUSY01    | JF932001 | L | Liaoning, China | 2009       | 1.3        | 1.3        |
| 317 | LN1802     | MN419355 | W | Liaoning, China | 2019-05-24 | 1.3        | 1.3        |
| 318 | LN1801     | MN419354 | W | Liaoning, China | 2019-05-24 | 1.3        | 1.3        |
| 319 | SD0001     | AY897223 | W | Shandong, China | 2000       | 1.3        | 1.3        |
| 320 | SD07LK2    | EU264065 | L | Shandong, China | 2007       | <b>1.3</b> | <b>1.1</b> |
| 321 | SD07LK1    | FJ216405 | L | Shandong, China | 2007       | <b>1.3</b> | <b>1.1</b> |
| 322 | ZB110604-3 | KC841154 | Y | Shandong, China | 2011-06-04 | 1.3        | 1.3        |
| 323 | SD13QJ03   | KJ922509 | Y | Shandong, China | 2013-05-27 | 1.3        | 1.3        |
| 324 | SD13QJ01   | KJ922510 | Y | Shandong, China | 2013-05-27 | 1.3        | 1.3        |
| 325 | SD12HN01   | KM873187 | Y | Shandong, China | 2012       | 1.3        | 1.3        |
| 326 | SDAU1702   | KY980658 | L | Shandong, China | 2017       | 1.3        | 1.3        |
| 327 | SDAU1704   | KY980660 | L | Shandong, China | 2017       | 1.3        | 1.3        |
| 328 | GM0209-1   | MH379642 | W | Shandong, China | 2018       | 1.3        | 1.3        |
| 329 | GM0209-2   | MH379643 | W | Shandong, China | 2018       | 1.3        | 1.3        |
| 330 | GM0209-3   | MH379644 | W | Shandong, China | 2018       | 1.3        | 1.3        |
| 331 | GM0209-4   | MH379645 | W | Shandong, China | 2018       | 1.3        | 1.3        |

|     |           |          |   |                  |            |            |            |
|-----|-----------|----------|---|------------------|------------|------------|------------|
| 332 | GM0209-5  | MH379646 | W | Shandong, China  | 2018       | 1.3        | 1.3        |
| 333 | GM0209-6  | MH379647 | W | Shandong, China  | 2018       | 1.3        | 1.3        |
| 334 | SDGM1801  | MN413674 | W | Shandong, China  | 2018-02-16 | 1.3        | 1.3        |
| 335 | SD1802    | MN419336 | W | Shandong, China  | 2018-02-21 | 1.3        | 1.3        |
| 336 | SD1803    | MN419337 | W | Shandong, China  | 2018-03-07 | 1.3        | 1.3        |
| 337 | SD1805    | MN419343 | W | Shandong, China  | 2018-11-15 | 1.3        | 1.3        |
| 338 | SD1806    | MN419344 | W | Shandong, China  | 2019-01-11 | 1.3        | 1.3        |
| 339 | SD1807    | MN419345 | W | Shandong, China  | 2019-03-06 | 1.3        | 1.3        |
| 340 | SD1809    | MN419346 | W | Shandong, China  | 2019-03-17 | 1.3        | 1.3        |
| 341 | SD1810    | MN419347 | W | Shandong, China  | 2019-03-19 | 1.3        | 1.3        |
| 342 | SCDY1     | HQ425636 | L | Sichuan, China   | 2010       | 1.3        | 1.3        |
| 343 | SCGS-1    | JQ396302 | N | Sichuan, China   | 2010-10    | 1.3        | 1.3        |
| 344 | SCGA1     | KF796643 | Y | Sichuan, China   | 2011-10    | 1.3        | 1.3        |
| 345 | SCMSBS    | KF796644 | Y | Sichuan, China   | 2011-10    | 1.3        | 1.3        |
| 346 | SCMZ06    | KF796645 | Y | Sichuan, China   | 2011-10    | <b>1.3</b> | <b>1.1</b> |
| 347 | SCMZ92    | KF796647 | Y | Sichuan, China   | 2011-10    | 1.3        | 1.3        |
| 348 | SCSM01    | KF796657 | Y | Sichuan, China   | 2011-10    | 1.3        | 1.3        |
| 349 | TJ1801    | MN419353 | W | Tianjin, China   | 2019-05-18 | 1.3        | 1.3        |
| 350 | ADOL-7501 | AY027920 | W | USA              | 1997       | 2          | 2          |
| 351 | 1696      | AF247384 | W | USA              | 1997       | 2          | 2          |
| 352 | 6803      | AF247388 | W | USA              | 1997       | 2          | 2          |
| 353 | 6827      | AF247389 | W | USA              | 1997       | 2          | 2          |
| 354 | AF88      | AF247390 | W | USA              | 1997       | 2          | 2          |
| 355 | UD-J1     | AF305091 | N | USA              | 2000       | 2          | 2          |
| 356 | QL1       | MN496121 | L | Egypt            | 2019-02    | 2          | 2          |
| 357 | QL2       | MN496122 | L | Egypt            | 2018-11    | 2          | 2          |
| 358 | QL3       | MN496123 | L | Egypt            | 2018-04    | 2          | 2          |
| 359 | QL4       | MN496124 | L | Egypt            | 2019-05    | 2          | 2          |
| 360 | QL5       | MN496125 | L | Egypt            | 2019-12    | 2          | 2          |
| 361 | QL6       | MN496126 | L | Egypt            | 2018-08    | 2          | 2          |
| 362 | SCSM00    | KF796652 | Y | Sichuan, China   | 2011-10    | 2          | 2          |
| 363 | GDQJ-1    | KU254611 | N | Guangdong, China | 2014       | 2          | 2          |
| 364 | HB18XH01  | MN735298 | Y | Hebei, China     | 2018       | 2          | 2          |
| 365 | SH18JY01  | MN735306 | Y | Shanghai, China  | 2018       | 2          | 2          |
| 366 | SH18JY02  | MN735307 | Y | Shanghai, China  | 2018       | 2          | 2          |
| 367 | JL09H01   | HQ148554 | L | Jilin, China     | 2009       | UNCL       | UNCL       |
| 368 | JL09L01   | HQ148555 | L | Jilin, China     | 2009       | UNCL       | UNCL       |
| 369 | JL09DH02  | HQ634812 | L | Jilin, China     | 2009-03    | UNCL       | UNCL       |

ev/J: a member of the endogenous avian virus family; W: White-chickens; L: layers; Y: Yellow-chickens; G: gamecock; WB: wild birds; N: not available; 817: Crossbreed broilers. <sup>1</sup>represents the classification results of a phylogenetic tree constructed using RAXML software; <sup>2</sup>represents the classification results of a phylogenetic tree constructed using IQ-TREE software.

**Supplementary Table S3.** Viruses included in Supplementary Table S1 and S2 that represent other viruses with identical sequences

| No. | Clades | Viruses              | Other viruses with identical sequences |
|-----|--------|----------------------|----------------------------------------|
| 1   | 1.1    | ADOL Line 0_AF247392 | 4.1_AY157601                           |
| 2   |        |                      | AHq02_KF534753                         |
| 3   |        |                      | GX13LT02_KY983559                      |
| 4   |        |                      | GD1402J_KP317565                       |
| 5   |        |                      | PK19FA01_MN956379                      |
| 6   | 1.1    | HuB09JY04_JN378888   | RB_KY085948                            |
| 7   |        |                      | SCNC1260_KF796650                      |
| 8   | 1.1    | LYJ195_KF218957      | GZA3_KX010989                          |
| 9   |        |                      | GZZ47_KX056485                         |
| 10  |        |                      | BR170_KF575331                         |
| 11  |        |                      | BR09J_JX444701                         |
| 12  | 1.1    | GX14YYA1_MF461280    | GX14DJ45_KY983565                      |
| 13  |        |                      | GX14DJ53_KY983567                      |
| 14  |        |                      | GX14PP03_KX506774                      |
| 15  |        |                      | GX15PP03_KU848762                      |
| 16  | 1.1    | CL09DP01_JN378882    | GZL1_KX077608                          |
| 17  |        |                      | GZD17_KX056482                         |
| 18  |        |                      | GZD13_KX056481                         |
| 19  |        |                      | GZZ18_KX010993                         |
| 20  |        |                      | GZZ12_KX010992                         |
| 21  |        |                      | GZZ8_KX010991                          |
| 22  |        |                      | CL09DP04_JN378885                      |
| 23  |        |                      | CL09DP03_JN378884                      |
| 24  |        |                      | CL09DP02_JN378883                      |
| 25  |        |                      | GL09DP01_JN378886                      |
| 26  |        |                      | LH091101_KF291259                      |
| 27  |        |                      | LYJ15_KF201290                         |
| 28  |        |                      | BR2_KF201289                           |
| 29  |        |                      | SDYC02J_JN388907                       |
| 30  | 1.1    | 10022-2_GU222396     | 10022-4_GU222397                       |
| 31  |        |                      | 10022-8_GU222398                       |
| 32  |        |                      | 10075-2_GU222402                       |
| 33  |        |                      | 10075-4_GU222403                       |
| 34  |        |                      | 10075-8_GU222404                       |
| 35  |        |                      | 10089-2_GU222408                       |
| 36  |        |                      | 10089-4_GU222409                       |
| 37  |        |                      | 10089-8_GU222410                       |
| 38  | 1.1    | EAV-21-1_AJ623291    | SCYA788_KF796655                       |
| 39  | 1.1    | BJ090201J_HQ333267   | QF081201J_HQ333268                     |
| 40  | 1.1    | TA081225J_HQ333269   | HH11_JX014438                          |
| 41  | 1.1    | GZA8_KX077606        | GZC33_KX077607                         |
| 42  | 1.1    | FJ201307_KM655821    | FJ201308_KM655822                      |
| 43  | 1.2    | WB11016j_JX570795    | WB11042j_JX570796                      |
| 44  |        |                      | WB11058j_JX570793                      |
| 45  |        |                      | SD1009_KF768000                        |
| 46  | 1.2    | JL08CH3-1_HQ634809   | JL093-1_JN624878                       |
| 47  | 1.2    | SD12HN03_KM873189    | SD12HN04_KM873190                      |
| 48  | 1.2    | GX14YL03_KR025484    | GX14YL13_KT598468                      |
| 49  | 1.2    | HLJ09SH02_HQ634807   | HLJ10SH03_HQ634813                     |

|    |      |                     |                    |
|----|------|---------------------|--------------------|
| 50 | 1.2  | SDAUAJ-3_KY767730   | GX-RJ01_MT119963   |
| 51 | 1.3  | GX14NN01_MN066154   | GD15MM02_MN066151  |
| 52 |      |                     | GX17YL05_MN066142  |
| 53 |      |                     | GX17NN05_MN066145  |
| 54 |      |                     | GX17NN06_MN066144  |
| 55 | 1.3  | GX-J-9_JQ246098     | GX-E-9_HM988992    |
| 56 |      |                     | GX11GL09_KT598496  |
| 57 | 1.3  | GX-J-4_JQ246093     | GX10YL04_KT598498  |
| 58 | 1.3  | GX-J-8_JQ246097     | GX10GL08_KT598499  |
| 59 | 1.3  | GX-J-10_JQ246099    | GX11GL10_KT598495  |
| 60 | 1.3  | JS18YZ02_MN735304   | JS18YZ03_MN735305  |
| 61 | 1.3  | GDQY1201_JX423792   | GDKP1202_JX453210  |
| 62 | 1.3  | GD13GZ_KU500030     | WGZ13_KJ631313     |
| 63 | 1.3  | GX10YL22_KT598497   | GXSH02_HQ185698    |
| 64 | 1.3  | GX-J-7_JQ246096     | GX10GL07_KT598500  |
| 65 | 1.3  | GD13HY_KU500031     | WLY13_KJ631311     |
| 66 | 1.3  | GX20YL05_MW491266   | GX20YL09_MW491270  |
| 67 | 1.3  | GX17YL02_MW491254   | GX17YL03_MW491255  |
| 68 | 1.3  | HLJ09MDJ-1_JN624880 | HLJ13SH01_KM376510 |
| 69 | UNCL | JL09L01_HQ148555    | JL09DH02_HQ634812  |

**Supplementary Table S4.** Estimates of the evolutionary distances that are between clades and within clades of viruses

| Clades | No. of base substitutions per site in lower triangle <sup>1</sup> |             |             |     |
|--------|-------------------------------------------------------------------|-------------|-------------|-----|
|        | 1.1                                                               | 1.2         | 1.3         | 2   |
| 1.1    | 3.6                                                               |             |             |     |
| 1.2    | <b>6.7</b>                                                        | 5.4         |             |     |
| 1.3    | <b>6.7</b>                                                        | <b>7.4</b>  | 6.5         |     |
| 2      | <b>13.8</b>                                                       | <b>14.8</b> | <b>15.0</b> | 6.0 |

<sup>1</sup> The numbers of base substitutions per site from averaging over all sequence pairs between clades and within clades of viruses are shown. All results are based on the pairwise analysis of clades 1 and 2, and the number of sequences analyzed per groups from the classification results of RAXML was: Clade 1.1, n =114; Clade 1.2, n=80; Clade 1.3, n=193; Clade 2, n = 17. Bold numbers represents different inter-clade nucleotide distance that is greater than 5% and 10%, respectively.

**Supplementary Table S5.** Estimates of the evolutionary distances that are between clades and within clades of viruses

| Clades | No. of base substitutions per site in lower triangle <sup>1</sup> |             |             |     |
|--------|-------------------------------------------------------------------|-------------|-------------|-----|
|        | 1.1                                                               | 1.2         | 1.3         | 2   |
| 1.1    | 3.8                                                               |             |             |     |
| 1.2    | <b>6.7</b>                                                        | 5.5         |             |     |
| 1.3    | <b>6.7</b>                                                        | <b>7.5</b>  | 6.5         |     |
| 2      | <b>13.9</b>                                                       | <b>14.9</b> | <b>15.0</b> | 6.0 |

<sup>1</sup> The numbers of base substitutions per site from averaging over all sequence pairs between clades and within clades of viruses are shown. All results are based on the pairwise analysis of clades 1 and 2, and the number of sequences analyzed per groups from the classification results of IQ-TREE was: Clade 1.1, n =121; Clade 1.2, n=80; Clade 1.3, n=186; Clade 2, n = 17. Bold numbers represents different inter-clade nucleotide distance that is greater than 5% and 10%, respectively.
